# Supplementary material for: Amorphous nano-structured silicas for high-performance carbon dioxide confinement
Source: Royal Society of Chemistry journal article supplement (doi:10.1039/c0jm00164c), 2010-01-01
Supplement: c0jm00164c.pdf [file c0jm00164c.pdf]

***Electronic supplementary information (ESI)***

**Amorphous nano-structured silicas for high-performance carbon dioxide confinement**

Shinichiro Ichikawa,<sup>a</sup> Tsunetake Seki,<sup>†a</sup> Mizuki Tada,<sup>b</sup> Yasuhiro Iwasawa<sup>b</sup> and Takao Ikariya<sup>\*a</sup>

<sup>a</sup> *Department of Applied Chemistry, Graduate School of Science and Engineering, Tokyo Institute of Technology, 2-12-1 O-okayama, Meguro-ku, Tokyo 152-8552, Japan*

<sup>b</sup> *Graduate School of Science, The University of Tokyo, 7-3-1 Hongo, Bunkyo-ku, Tokyo 113-0033, Japan*

<sup>†</sup> *Research Fellow of the Japan Society for the Promotion of Science*

\* To whom correspondence should be addressed. E-mail: [tikariya@apc.titech.ac.jp](mailto:tikariya@apc.titech.ac.jp)

## Contents

|                                                          |                  |
|----------------------------------------------------------|------------------|
| <b>1. Additional experimental section</b>                | <b>S3</b>        |
| <b>1.1. Raman spectroscopy</b>                           | <b>S3</b>        |
| <b>1.2. Transmission electron microscopy (TEM)</b>       | <b>S3</b>        |
| <b>1.3. N<sub>2</sub> and Ar adsorption measurements</b> | <b>S3</b>        |
| <b>1.4. References</b>                                   | <b>S3</b>        |
| <b>2. Figs. S1–S4</b>                                    | <b>S4 and S5</b> |

## 1. Additional experimental section

### 1.1. Raman spectroscopy

Raman spectra of adsorbed CO<sub>2</sub> were measured using an NRS-2100 spectrometer (JASCO) with a 514.5-nm laser (laser power 5 mW, exposure time 900 s × 2) and a resolution of 2 cm<sup>-1</sup>. Indene under inert atmosphere or an artificial diamond<sup>S1</sup> (Tokyo Progress System, Raman shift 1332 cm<sup>-1</sup>) was used for the wavenumber calibration. The spectra of CO<sub>2</sub>-condensed adsorbents were recorded under ambient conditions, while the measurement of solid CO<sub>2</sub> was performed at -170 °C with a cooled cell (Linkam, model THMS600/LK-600PM/L-600A).

### 1.2. Transmission electron microscopy (TEM)

TEM measurements were performed on a JEM-2010F (JEOL) equipped with a field emission gun (operated at 200 kV). The S-400 and S-800 samples were pretreated at 400 °C for 3 h in a stream of dry air (dew point ca. -40 °C) prior to the measurements.

### 1.3. N<sub>2</sub> and Ar adsorption measurements

Surface areas and pore structures were characterized by measuring the N<sub>2</sub> and Ar adsorption–desorption isotherms using a BELSORP-mini (BEL Japan) for N<sub>2</sub> and an Autosorb-1-MPa analyzer (Quantachrome) for Ar, respectively. Before the measurements, the samples were treated at 400 °C for 3 h in a stream of dry air (dew point ca. -40 °C), and subsequently at 120 °C for 3 h under N<sub>2</sub> flow on the BELSORP-mini apparatus and 200 °C for 3 h under vacuum (<10<sup>-5</sup> Pa) on the Quantachrome apparatus, respectively.

### 1.4. References

S1 S. A. Solin and A. K. Ramdas, *Phys. Rev. B*, 1970, **1**, 1687.

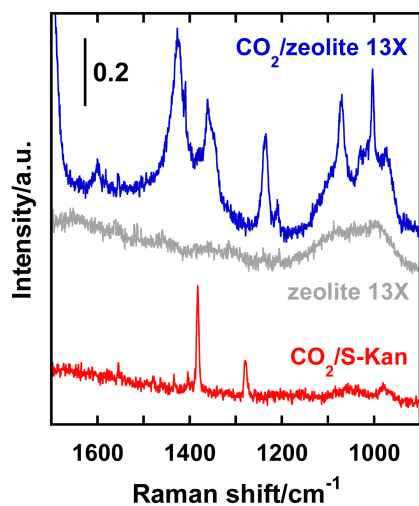

**Fig. S1** Comparison of the Raman spectra of adsorbed CO<sub>2</sub> between S-Kan and zeolite 13X. For experimental details, see “Notes and references section” and “Additional experimental section in ESI”. Indene under inert atmosphere was used for the wavenumber calibration.

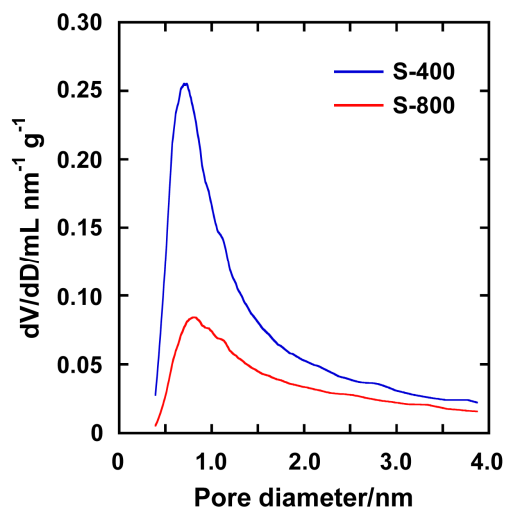

**Fig. S2** Saito–Foley pore-size distributions of S-400 and S-800.

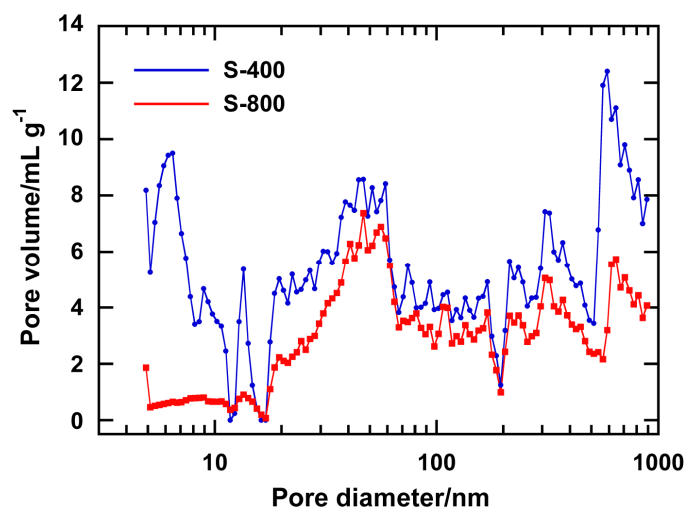

**Fig. S3** Pore-size distributions of S-400 and S-800 determined by the non-local density functional theory (NL-DFT).

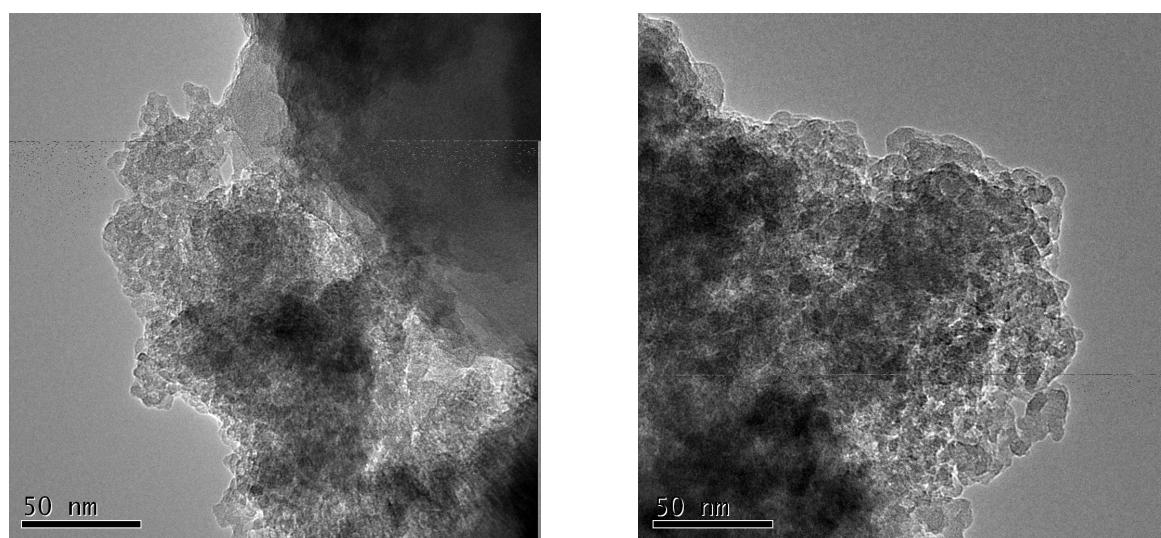

**Fig. S4** TEM images of S-400 (left) and S-800 (right). Note that the mean first-order-particle size was larger for S-800 than for S-400 due to the difference in calcination temperature that determines the extent of sintering.
